# Supplementary material for: Novel T cells with improved in vivo anti-tumor activity generated by RNA electroporation
Source: PubMed Central journal article supplement (PMC5498341; doi:10.1007/s13238-017-0422-6), 2017-05-18
Supplement: 13238_2017_422_MOESM1_ESM.pdf [file 13238_2017_422_MOESM1_ESM.pdf]

# Supplementary data

## Novel T cells with improved in vivo anti-tumor activity generated by RNA electroporation

Xiaojun Liu<sup>1,2</sup>, Shuguang Jiang<sup>2</sup>, Chongyun Fang<sup>2</sup>, Hua Li<sup>2</sup>, Xuhua Zhang<sup>2</sup>, Fuqin Zhang<sup>2</sup>, Carl H. June<sup>2,3</sup> and Yangbing Zhao<sup>2,3</sup>

**Running title: Generating novel T cells by RNA electroporation to improve cancer treatment**

**Keywords:** T lymphocytes, CAR, manufacture, gene transfer, RNA electroporation

\* To whom correspondence should be addressed:

Yangbing Zhao, M.D., Ph.D.  
University of Pennsylvania School of Medicine  
Center for Cellular Immunotherapies  
3400 Civic Center Blvd TRC 421, RM08-122  
Philadelphia, PA 19104-5156  
Email: [Yangbing@upenn.edu](mailto:Yangbing@upenn.edu)

<sup>1</sup> Key Laboratory for Experimental Teratology of Ministry of Education and Department of Immunology, School of Basic Medical Sciences, Shandong University, Jinan, China

<sup>2</sup> Center for Cellular Immunotherapies, University of Pennsylvania Cancer Center, Philadelphia, PA 19104

<sup>3</sup> Department of Pathology and Laboratory Medicine, Perelman School of Medicine, University of Pennsylvania, Philadelphia, Pennsylvania

**MALPVTALLPLALLLHAARPQVQLQQSGAELARPGASVKMSCKASGYTFTRYTMHWVKQR**  
 ←  
**PGQGLEWIGYINPSRGYTNYNQKFKDKATLTTDKSSSTAYMQLSSLTSEDSAVYYCARYYDDH**  
 \_\_\_\_\_  
**YCLDYWGQGTTLTVSSSGGGGGSGGGGGSGGGGSIVLTQSPAIMSASPGEKVTMTCSASSSVSY**  
 \_\_\_\_\_ **OKT3 scFv** \_\_\_\_\_  
**MNWYQQKSGTSPKRWIYDTSKLAGVPAHFRGSGSGTSSYSLTISGMEAEDAATYYCQQWSS**  
 \_\_\_\_\_  
**NPFTFGSGTKLEINRAAA** **TTTPAPRPPTPAPTIASQPLSLRPEACRPAAGGAVHTRGLDFACD**  
 \_\_\_\_\_> | | <\_\_\_\_\_ **CD28 Hinge** \_\_\_\_\_> |  
**FWVLVVGGLACYSLLVTVAFIIFWY** **RSKRSLLLHSDYMNMTPRRPGPTRKHYPYAPPRD**  
 |<\_\_\_\_\_ **CD28 transmembrane** \_\_\_\_\_>|<\_\_\_\_\_ **CD28** \_\_\_\_\_>|  
**FAAYRSKRGRKLLYIFKQPFMRPVQTTQEEDGCSCRFPEEEEGGCEL**  
 \_\_\_\_\_>|<\_\_\_\_\_ **4-1BB** \_\_\_\_\_>|

**Supplemental Figure 1. Sequence of OKT3-28BB.** The sequence is composed of following parts as indicated: OKT3 Single-chain variable fragment (OKT3 scFv), hinge from CD28 (CD28 Hinge), transmembrane from CD28 (CD28 transmembrane), cytoplasmic region of human CD28 (CD28) and cytoplasmic region of human 4-1BB (4-1BB).

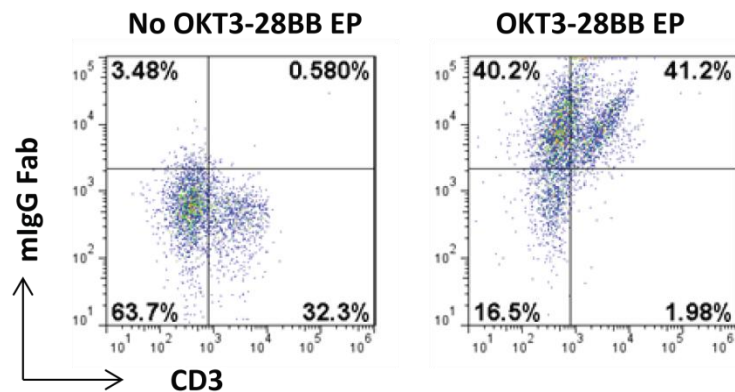

**Supplemental Figure 2. OKT3-28BB expression of RNA electroporated PBMCs.** PBMCs from a normal donor were electroporated with OKT3-28BB RNA (OKT3-28BB EP) and OKT3-28BB expression was detected using an antibody against murine IgG Fab (mIgG Fab) 18h post RNA electroporation. PBMCs that were not electroporated with OKT3-28BB RNA (No OKT3-28BB EP) was used as control.

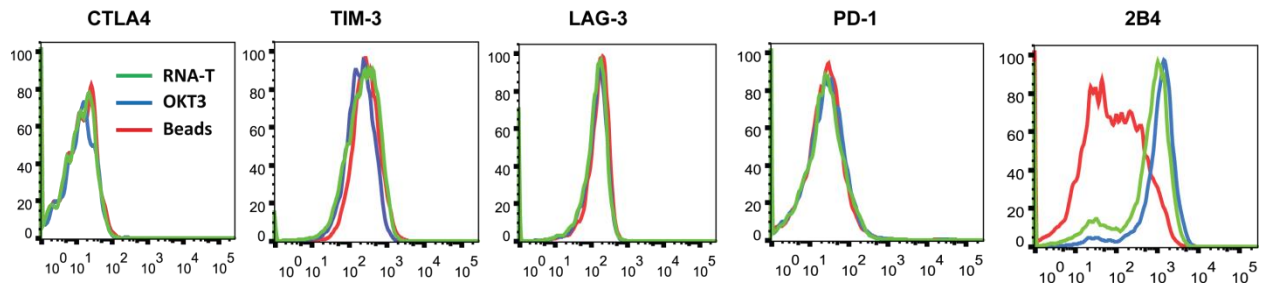

**Supplementary Figure 3. Expression of exhaustion markers.** Expression of the exhaustion markers CTLA4, TIM-3, LAG-3, PD-1 and 2B4 were detected respectively for the T cells generated by OKT3-28BBZ RNA electroporation (RNA-T), OKT3/IL-2 stimulation (OKT3) or CD3/CD28 DynaBead stimulation (Beads) 10 days after stimulation.
